# Supplementary material
Source: ML conference proceedings conference paper supplement (https://proceedings.neurips.cc/paper_files/paper/2011/hash/33ebd5b07dc7e407752fe773eed20635-Abstract.html)
Supplement: Supplementary file 2 [file 33ebd5b07dc7e407752fe773eed20635-Supplemental.zip]

Archive with 1 entries (1 files):
- all/Paper 1341/submod_bandit.pdf
